# Supplementary material for: Assessment of Four Portuguese Wheat Landrace Diversity to Cope With Global Warming
Source: PubMed Central journal article supplement (PMC7756116; doi:10.3389/fpls.2020.594977), 2020-12-09
Supplement: Data_Sheet_1.pdf [file Data_Sheet_1.pdf]

## Supplementary Material

**Supplementary Table 1.** Flowering time (days from germinations to flowering) of wheat landraces studied.

| Wheat landraces | Days until flowering |
|-----------------|----------------------|
| Ardito          | 126±3                |
| Grécia          | 140±6                |
| Magueija        | 157±3                |
| Ruivo           | 129±4                |

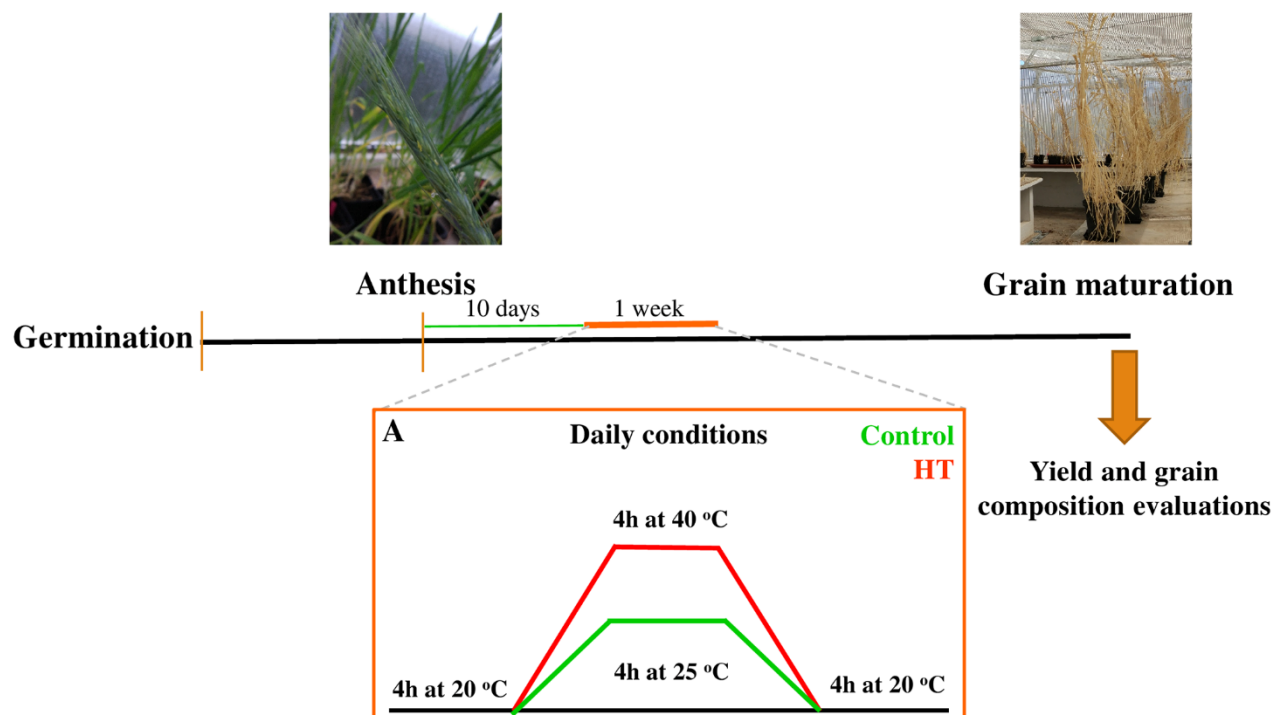

**Supplementary Figure 1.** High temperature assay schematic representations.

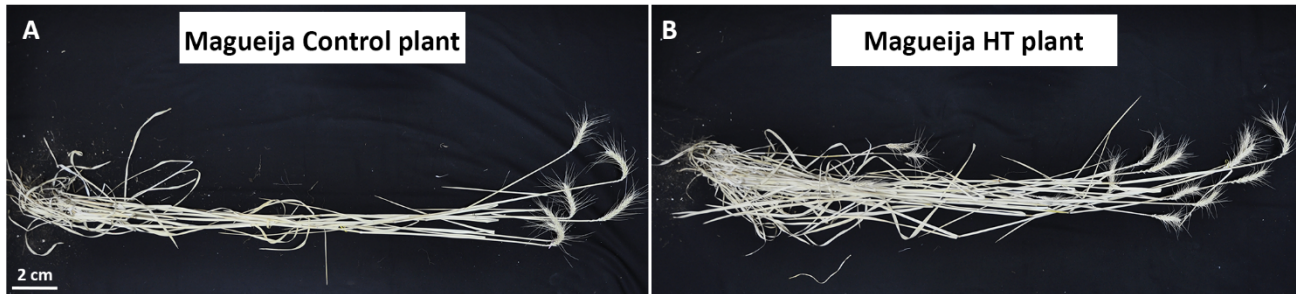

**Supplementary Figure 2.** Wheat Magueija mature plants (A) kept in control conditions and (B) high temperature (HT) treated.

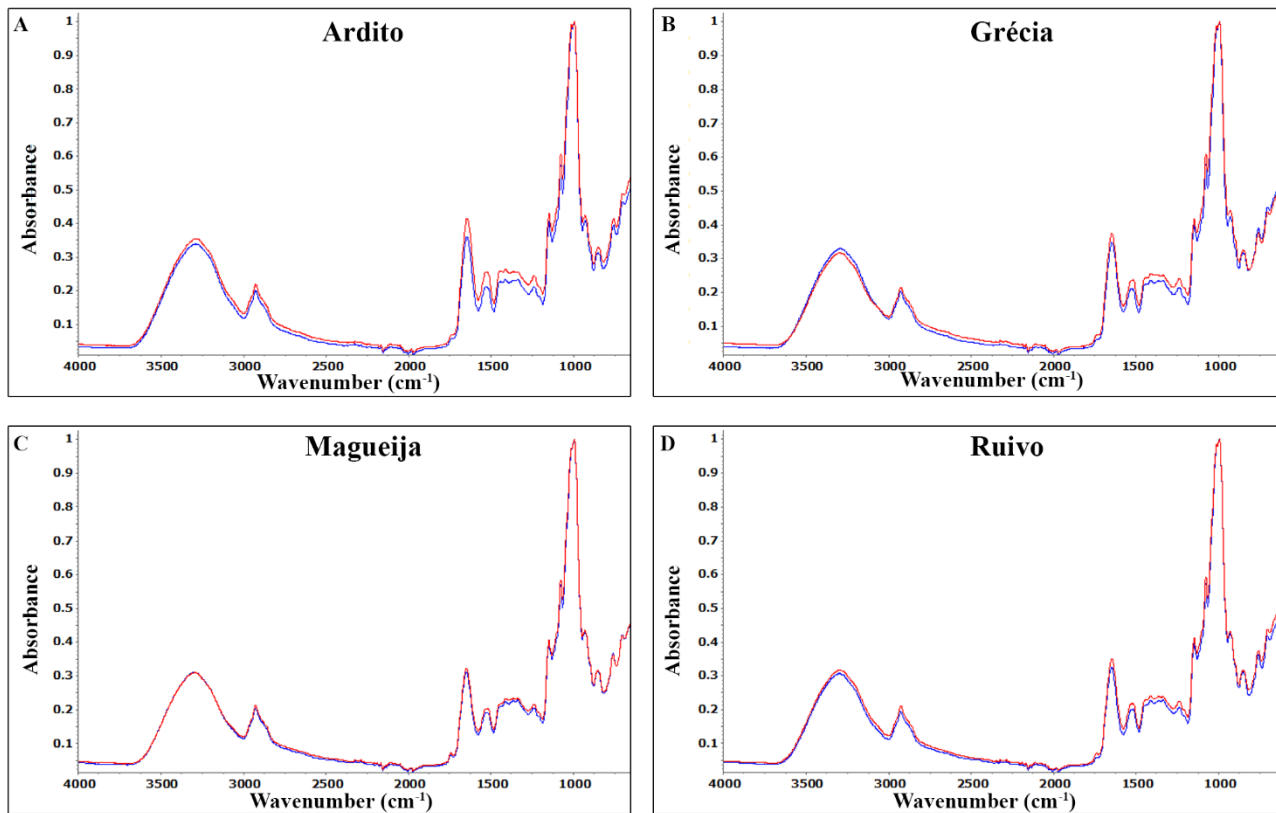

**Supplementary Figure 3.** Average ATR-FTIR spectra of flour from control (blue) and HT treated (red) plants of wheat landraces (A) Ardito, (B) Grécia, (C) Magueija and (D) Ruivo.

**Supplementary Table 2.** Nitrogen content of flour samples from plants kept in control conditions and high temperature (HT) treated, quantified by Elemental Analysis.

| Sample         | Nitrogen content (mg of N/ 100 mg of flour) |                                      |
|----------------|---------------------------------------------|--------------------------------------|
|                | Predicted by model                          | Quantification by elemental analysis |
| Ardito HT      | 4.7                                         | 4.5                                  |
| Ardito HT      | 4.2                                         | 3.8                                  |
| Grécia HT      | 3.9                                         | 3.4                                  |
| Ardito HT      | 3.7                                         | 2.9                                  |
| Ardito Control | 3.5                                         | 2.8                                  |
| Ardito Control | 3.2                                         | 2.6                                  |
| Grécia HT      | 3.1                                         | 2.7                                  |
| Magueija HT    | 2.8                                         | 2.5                                  |
| Ruivo HT       | 2.4                                         | 2.1                                  |
| Magueija HT    | 2.0                                         | 2.1                                  |
